# Supplementary material
Source: HighWire-hosted journal article supplement (https://erj.ersjournals.com/content/55/4/1901678)
Supplement: inline-supplementary-material-2 [file inline-supplementary-material-2.pdf]

**Supplementary Figure S1: AATD and healthy control neutrophils express equal primary granule content.**

The aim of this experiment was to evaluate whether the observed increased level of primary granule exocytosis by AATD neutrophils was as a result of increased granule content within the AATD cell. However, by Western blot analysis of whole cell lysates, equal MPO expression in HC, AATD ( $FEV_1 > 80\%$ ), AATD ( $FEV_1 < 80\%$ ) and non-AATD COPD  $FEV_1$  matched patients ( $FEV_1 < 80\%$ ) was confirmed. This latter result eliminates disproportionate levels of granule content as the cause for increased degranulation by AATD cells (Supplementary figure S1).

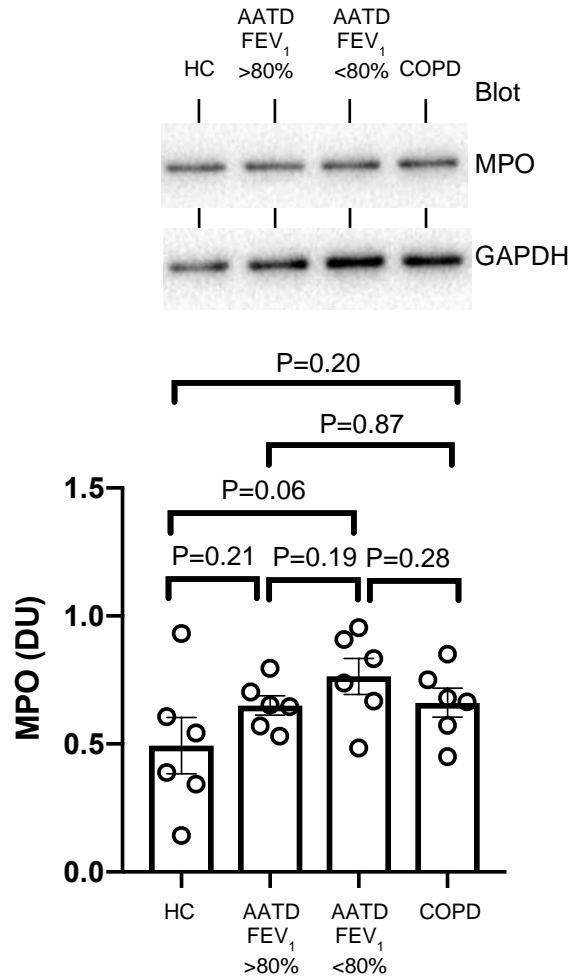

**Supplementary figure S1 legend: AATD neutrophils illustrate equal expression of primary granule protein.**

Neutrophils ( $1 \times 10^7$  cells per patient) were isolated from the peripheral blood of healthy controls (HC), AATD patients without obstruction (AATD FEV<sub>1</sub>>80%), AATD patients with airways obstruction (AATD FEV<sub>1</sub> <80%) and patients with non-AATD COPD (COPD FEV<sub>1</sub><80%). Western blot and densitometric analysis of unstimulated neutrophil whole cell lysates demonstrated no difference in intracellular MPO levels between groups (all comparisons by unpaired t-test; n=6 subjects per group). Western blot of the same samples for GAPDH demonstrated equal protein loading indicative of equal cell numbers used per reaction.

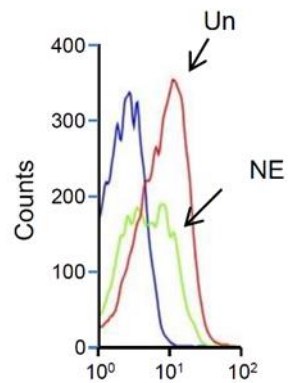

### **Supplementary Figure S2: NE cleavage of PAR2**

Flow cytometry analysis using a FITC-labelled anti-PAR2-antibody demonstrates reduced levels of plasma membrane PAR2 post NE exposure (100nM, 15min) compared to untreated cells (Un). Representative image from n=3 biological repeats. Isotype control presented in blue.

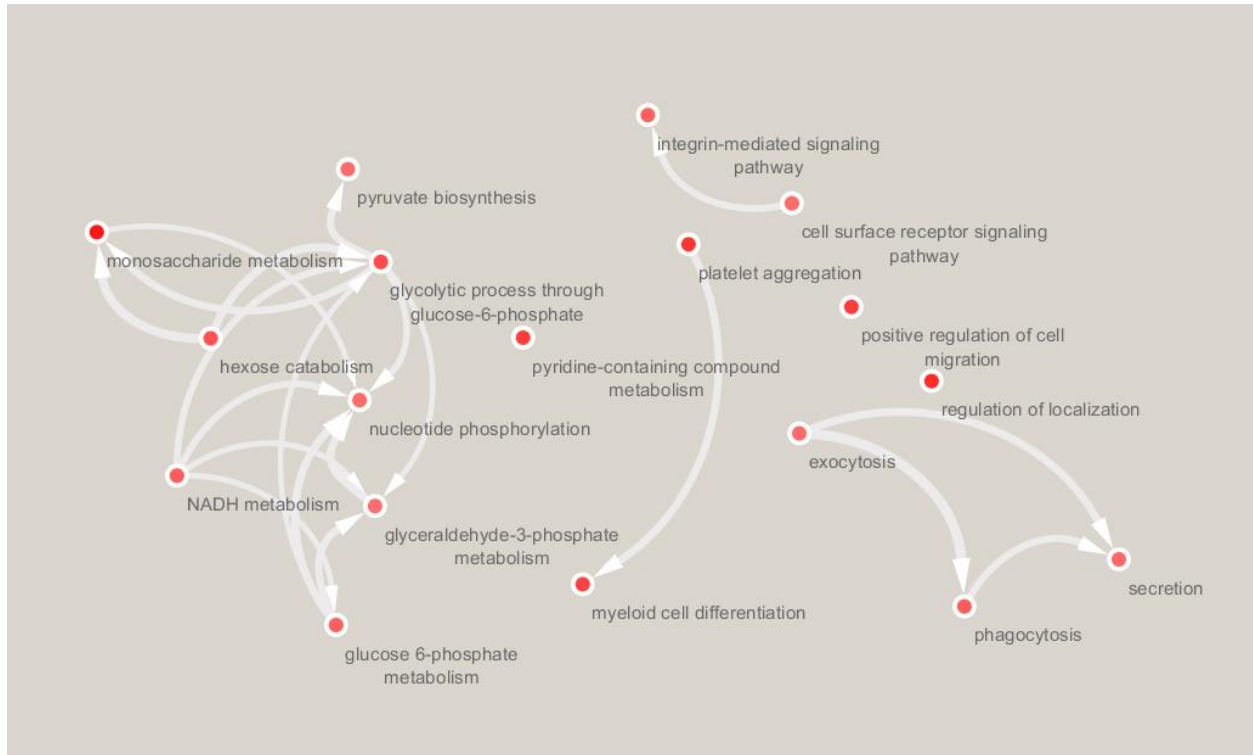

**Supplementary Figure S3: The neutrophil PM proteome is modified by AAT augmentation therapy in vivo.** Selected GO BP enrichment clusters for the dataset of proteins differentially expressed between day 0 and day 2 of AAT augmentation therapy in AATD individuals. GO analysis performed by GORILLA on DE proteins (fold change >1.5,  $p \leq 0.05$ ) and redundant GO terms removed by REVIGO. Related GO terms are linked by lines and grouped according to similarity.
