# Supplementary material
Source: HighWire-hosted journal article supplement (https://erj.ersjournals.com/content/55/4/1901678)
Supplement: inline-supplementary-material-3 [file inline-supplementary-material-3.pdf]

**Supplementary table S1: The neutrophil plasma membrane fraction demonstrates increased abundance of neutrophil granule proteins in AATD-COPD compared to normal COPD.**

Granule constituent proteins increased in abundance (>1.5 fold change change, ANOVA p<0.05) in the neutrophil plasma membrane fraction from AATD-COPD individuals compared to COPD.

UniProtKB, Universal Protein knowledgebase. GN, gene name.

| Protein                                                               | Main neutrophil granule subtype | Fold change | P value |
|-----------------------------------------------------------------------|---------------------------------|-------------|---------|
| Bactericidal permeability-increasing protein<br>GN= <i>BPI</i>        | Primary                         | 8.4         | 0.021   |
| Myeloperoxidase OS=Homo sapiens<br>GN= <i>MPO</i>                     | Primary                         | 3.3         | 0.025   |
| EH domain-containing protein 1<br>GN= <i>EHD1</i>                     | Secondary                       | 7.2         | 0.014   |
| Moesin<br>GN= <i>MSN</i>                                              | Secondary                       | 5.2         | 0.019   |
| Integrin alpha-L<br>GN= <i>ITGAL</i>                                  | Secondary and tertiary          | 6.3         | 0.008   |
| Integrin alpha-M<br>GN= <i>ITGAM (CD11b)</i>                          | Secondary and tertiary          | 4.7         | 0.022   |
| Neprilysin<br>GN= <i>MME</i>                                          | Tertiary                        | 11.4        | 0.018   |
| V-type proton ATPase 116 kDa subunit a isoform 3<br>GN= <i>TCIRG1</i> | All three                       | 6.5         | 0.033   |
