# Supplementary material
Source: HighWire-hosted journal article supplement (https://erj.ersjournals.com/content/55/4/1901678)
Supplement: inline-supplementary-material-4 [file inline-supplementary-material-4.pdf]

**Supplementary table S2: The neutrophil PM proteome on day 0 of AAT augmentation therapy is enriched for degranulation proteins.**

Intrinsic neutrophil proteins differentially expressed on the plasma membrane surface between day 0 and day 2 of AAT augmentation therapy in AATD individuals that are constituents of the exocytosis GO cluster, as determined by GORILLA (n=6). All proteins in this group were increased in abundance on day 0. DE defined as fold change >1.5,  $p \leq 0.05$ .

| <b>GO0006887 Exocytosis : Enrichment score 1.64, p= 0.0008</b> |                                                                     |                    |                |
|----------------------------------------------------------------|---------------------------------------------------------------------|--------------------|----------------|
| <b>Gene</b>                                                    | <b>Protein</b>                                                      | <b>Fold Change</b> | <b>p value</b> |
| <i>MPO</i>                                                     | Myeloperoxidase                                                     | 2.57               | 0.05           |
| <i>PRTN3</i>                                                   | Proteinase 3                                                        | 2.7                | 0.005          |
| <i>LTF</i>                                                     | Lactoferrin                                                         | 2.9                | 0.03           |
| <i>MMP9</i>                                                    | Matrix metalloproteinase 9                                          | 3.26               | 0.03           |
| <i>ACTN1</i>                                                   | Actinin, alpha 1                                                    | 4.52               | 0.01           |
| <i>ANXA3</i>                                                   | Annexin a3                                                          | 2.34               | 0.04           |
| <i>CAP1</i>                                                    | Cap, adenylate cyclase-associated protein 1                         | 4.5                | 0.02           |
| <i>CPNE3</i>                                                   | Copine III                                                          | 2.32               | 0.009          |
| <i>FERMT3</i>                                                  | Fermitin family member 3                                            | 2.95               | 0.03           |
| <i>FLNA</i>                                                    | Filamin a, alpha                                                    | 2.54               | 0.003          |
| <i>GPI</i>                                                     | Glucose-6-phosphate isomerase                                       | 11.2               | 0.04           |
| <i>HSP90AA1</i>                                                | Heat shock protein 90kda alpha                                      | 2.66               | 0.04           |
| <i>HSPA8</i>                                                   | Heat shock 70kda protein 8                                          | 2.41               | 0.01           |
| <i>ITGA2B</i>                                                  | Integrin, alpha 2b                                                  | 2.7                | 0.005          |
| <i>ITGAL</i>                                                   | Integrin, alpha l (lymphocyte function-associated antigen 1; cd11a) | 3.76               | 0.04           |
| <i>ITGAM</i>                                                   | Integrin, alpha m (complement receptor 3 subunit, cd11b)            | 1.91               | 0.04           |
| <i>ITGB3</i>                                                   | Integrin, beta 3                                                    | 3.13               | 0.03           |
| <i>LCN2</i>                                                    | Lipocalin 2                                                         | 4.89               | 0.03           |
| <i>MYO1G</i>                                                   | Myosin                                                              | 1.97               | 0.01           |
| <i>PGAM1</i>                                                   | Phosphoglycerate mutase 1                                           | 10.22              | 0.03           |
| <i>PKM</i>                                                     | Pyruvate kinase                                                     | 3.41               | 0.04           |
| <i>PPIA</i>                                                    | Peptidylprolyl isomerase a (cyclophilin a)                          | 3.4                | 0.03           |
| <i>PRTPRC</i>                                                  | Protein tyrosine phosphatase, receptor type, c                      | 3.72               | 0.03           |
| <i>RAB3D</i>                                                   | Rab3d, member ras oncogene family                                   | 3.14               | 0.03           |
| <i>SPTAN1</i>                                                  | Spectrin, alpha, non-erythrocytic 1                                 | 8.89               | 0.03           |
| <i>STOM</i>                                                    | Stomatin                                                            | 2.29               | 0.03           |
| <i>STXBP2</i>                                                  | Syntaxin binding protein 2                                          | 1.85               | 0.04           |
| <i>TLN1</i>                                                    | Talin 1                                                             | 4.04               | 0.01           |
| <i>VCL</i>                                                     | Vinculin                                                            | 3.88               | 0.03           |
| <i>WDR1</i>                                                    | WD repeat domain 1                                                  | 12.55              | 0.03           |
