# Supplementary material
Source: HighWire-hosted journal article supplement (https://erj.ersjournals.com/content/55/4/1901678)
Supplement: inline-supplementary-material-5 [file inline-supplementary-material-5.pdf]

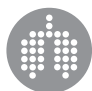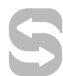

SHAREABLE PDF

# $\alpha_1$ Antitrypsin therapy modulates the neutrophil membrane proteome and secretome

Mark P. Murphy<sup>1</sup>, Thomas McEnery<sup>1</sup>, Karen McQuillan<sup>1</sup>, Oisín F. McElvaney<sup>1</sup>, Oliver J. McElvaney<sup>1</sup>, Sarah Landers<sup>1</sup>, Orla Coleman <sup>2</sup>, Anchalin Bussayajirapong<sup>1</sup>, Padraig Hawkins<sup>1</sup>, Michael Henry<sup>2</sup>, Paula Meleady<sup>2</sup>, Emer P. Reeves<sup>1,3</sup> and Noel G. McElvaney<sup>1,3</sup>

**Affiliations:** <sup>1</sup>Irish Centre for Genetic Lung Disease, Dept of Medicine, Royal College of Surgeons in Ireland, Education and Research Centre, Beaumont Hospital, Dublin, Ireland. <sup>2</sup>National Institute for Cellular Biotechnology, Dublin City University, Glasnevin, Dublin, Ireland. <sup>3</sup>Noel G. McElvaney and Emer P. Reeves share joint senior authorship.

**Correspondence:** Emer P. Reeves, Irish Centre for Genetic Lung Disease, Royal College of Surgeons in Ireland, Education and Research Centre, Beaumont Hospital, Dublin 9, Ireland. E-mail: emerreeves@rcsi.ie

 @ERSpublications

**Neutrophils from patients with COPD due to alpha-1 antitrypsin deficiency illustrate an altered membrane protein profile and primary granule exocytosis pattern compared to cells from COPD patients without AATD, a defect corrected by augmentation therapy** <http://bit.ly/3balrrT>

**Cite this article as:** Murphy MP, McEnery T, McQuillan K, *et al.*  $\alpha_1$  Antitrypsin therapy modulates the neutrophil membrane proteome and secretome. *Eur Respir J* 2020; 55: 1901678 [<https://doi.org/10.1183/13993003.01678-2019>].

This single-page version can be shared freely online.

**ABSTRACT** Obstructive pulmonary disease in patients with  $\alpha_1$  antitrypsin (AAT) deficiency (AATD) occurs earlier in life compared with patients without AATD. To understand this further, the aim of this study was to investigate whether AATD presents with altered neutrophil characteristics, due to the specific lack of plasma AAT, compared with non-AATD COPD.

This study focussed on the neutrophil plasma membrane and, by use of label-free tandem mass spectrometry, the proteome of the neutrophil membrane was compared in forced expiratory volume in 1 s (FEV<sub>1</sub>)-matched AATD, non-AATD COPD and in AATD patients receiving weekly AAT augmentation therapy (n=6 patients per cohort). Altered protein expression in AATD was confirmed by Western blot, ELISA and fluorescence resonance energy transfer analysis.

The neutrophil membrane proteome in AATD differed significantly from that of COPD as demonstrated by increased abundance and activity of primary granule proteins including neutrophil elastase on the cell surface in AATD. The signalling mechanism underlying increased degranulation involved Rac2 activation, subsequently resulting in proteinase-activated receptor 2 activation by serine proteinases and enhanced reactive oxygen species production. *In vitro* and *ex vivo*, AAT reduced primary granule release and the described plasma membrane variance was resolved post-AAT augmentation therapy *in vivo*, the effects of which significantly altered the AATD neutrophil membrane proteome to that of a non-AATD COPD cell.

These results provide strong insight into the mechanism of neutrophil driven airways disease associated with AATD. Therapeutic AAT augmentation modified the membrane proteome to that of a typical COPD cell, with implications for clinical practice.
